# Supplementary material
Source: publisher figshare collection journal article supplement (https://acs.figshare.com/ndownloader/files/8498474)
Supplement: Supplementary file 1 [file 8498474]

## Supporting Information

### **Single-Step Electrodeposited Molybdenum Incorporated Nickel Sulfide Thin Films from Low-Cost Precursors as Highly Efficient Hydrogen Evolution Electrocatalysts in Acid Medium**

Arun Prasad Murthy <sup>a</sup>, Jayaraman Theerthagiri <sup>a</sup>, Kumar Premnath<sup>a</sup>, Jagannathan Madhavan <sup>a,\*</sup>, Kadarkarai Murugan <sup>b</sup>

<sup>a</sup> Solar Energy Lab, Department of Chemistry, Thiruvalluvar University, Vellore-632 115, Tamilnadu, India.

<sup>b</sup> Department of Zoology, Bharathiar University, Coimbatore-641 046, Tamilnadu, India.

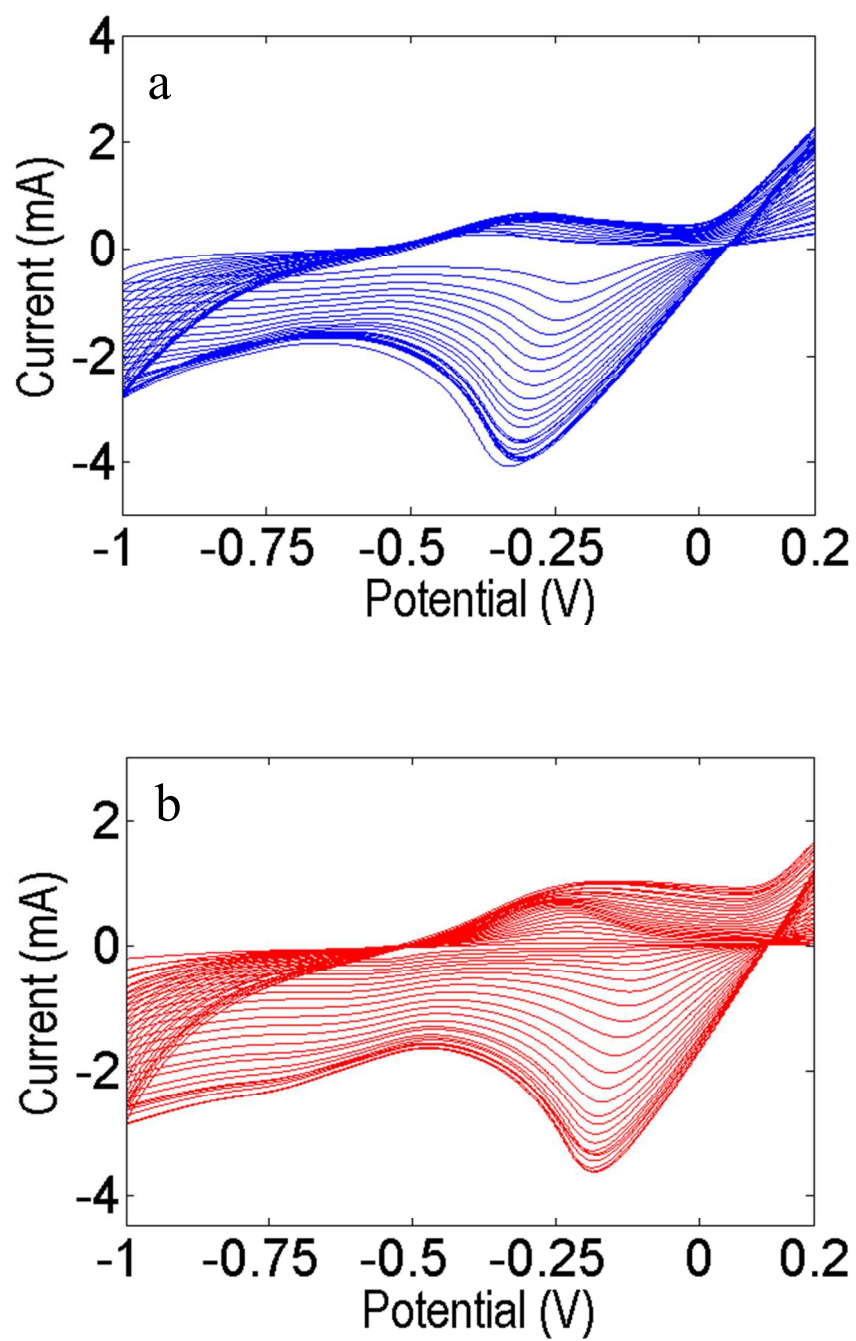

**Figure S1.** Typical deposition of a) NiS and b) Ni<sub>0.96</sub>Mo<sub>0.04</sub>S thin films on to FTO plates. Scan rate = 0.005 V/s; Cycles = 25.

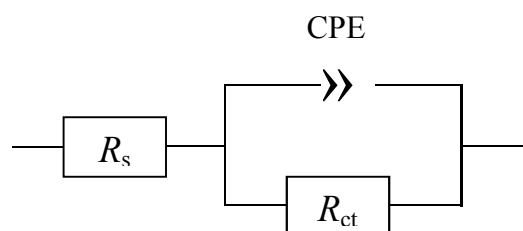

**Figure S2.** A simple Randles equivalent circuit with a constant phase element (CPE) replacing the double layer capacitance.

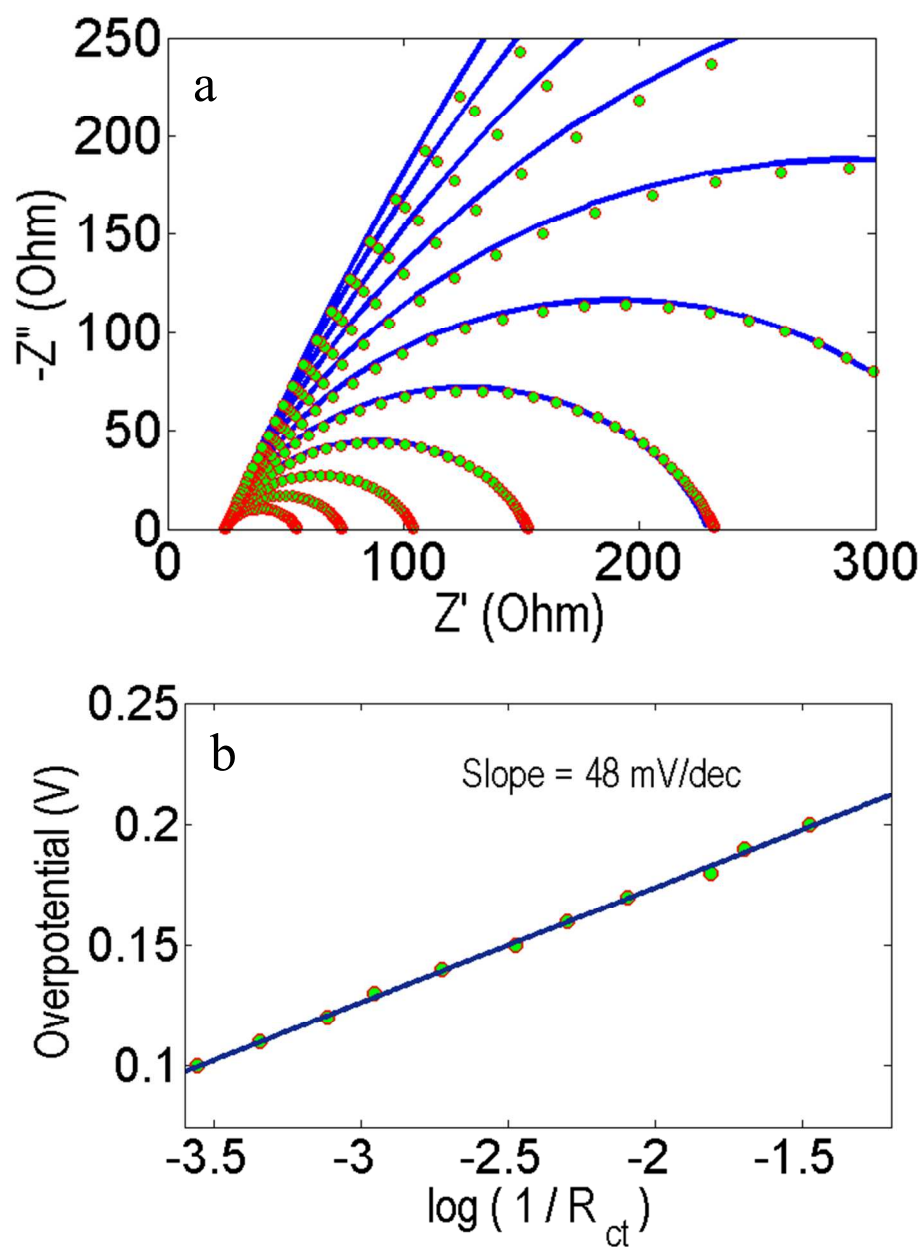

**Figure S3.** a) Nyquist plots of  $\text{Ni}_{0.92}\text{Mo}_{0.08}\text{S}$  thin film as a function of  $\eta$  from 0.2 V (smallest semi-circle) to 0.1 V (largest semi-circle) in increments of 0.01 V. Solid lines denote experimental data while circles represent fitting. b) Tafel plot of  $\text{Ni}_{0.92}\text{Mo}_{0.08}\text{S}$  thin film obtained employing  $R_{ct}$  data from the Nyquist plot.

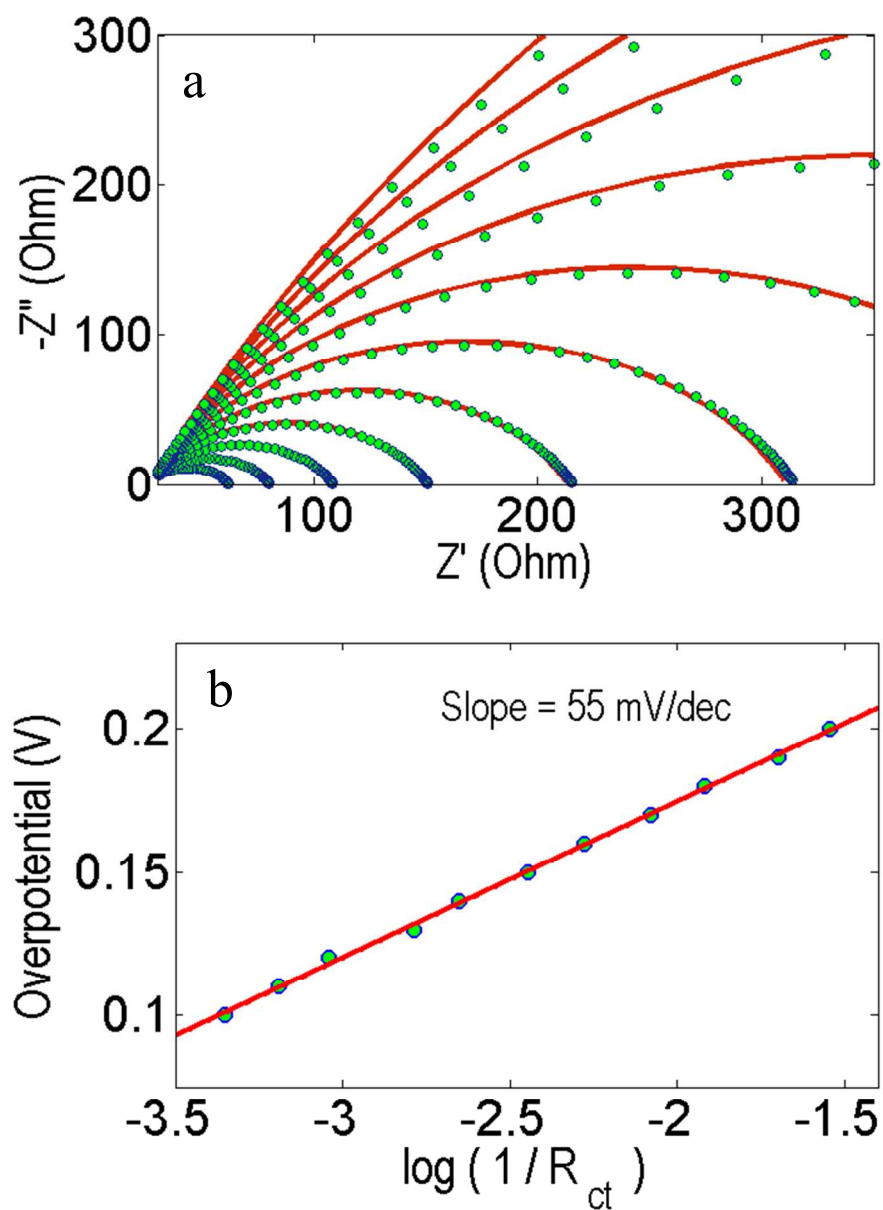

**Figure S4.** a) Nyquist plots of  $\text{Ni}_{0.84}\text{Mo}_{0.16}\text{S}$  thin film as a function of  $\eta$  from 0.2 V (smallest semi-circle) to 0.1 V (largest semi-circle) in increments of 0.01 V. Solid lines denote experimental data while circles represent fitting. b) Tafel plot of  $\text{Ni}_{0.84}\text{Mo}_{0.16}\text{S}$  thin film obtained using  $R_{ct}$  data from the Nyquist plot.

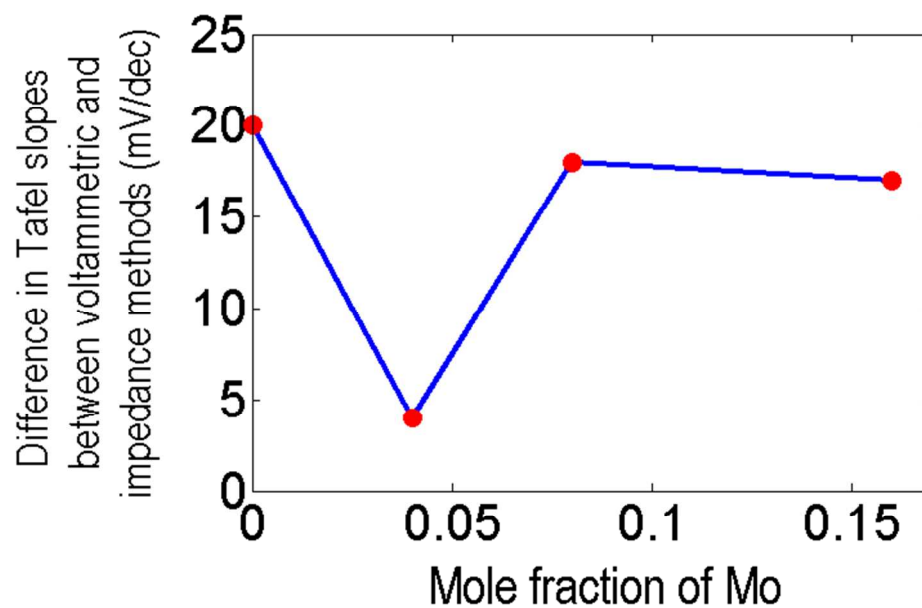

**Figure S5.** Difference in Tafel slopes between voltammetric and impedance methods as a function of mole fraction of Mo.

**Table S1.** Mo/Ni molar ratios of various  $\text{Ni}_{1-x}\text{Mo}_x\text{S}$  ( $x \neq 0$ ) samples determined by EDXS and ICP-OES analyses.

| Sample                                     | EDXS            | ICP-OES         |
|--------------------------------------------|-----------------|-----------------|
| $\text{Ni}_{0.96}\text{Mo}_{0.04}\text{S}$ | $0.04 \pm 0.01$ | $0.04 \pm 0.01$ |
| $\text{Ni}_{0.92}\text{Mo}_{0.08}\text{S}$ | $0.08 \pm 0.01$ | $0.09 \pm 0.02$ |
| $\text{Ni}_{0.84}\text{Mo}_{0.16}\text{S}$ | $0.17 \pm 0.02$ | $0.19 \pm 0.02$ |

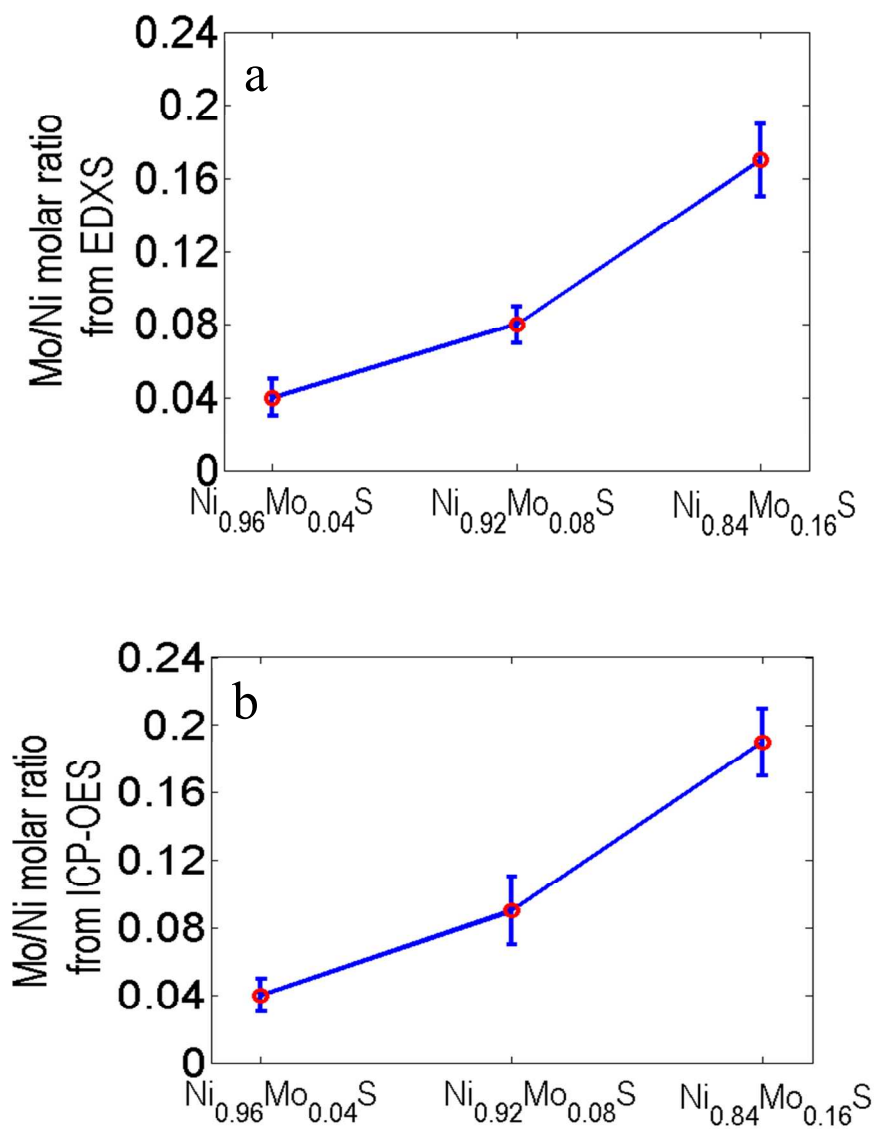

**Figure S6.** Error bar plots showing Mo/Ni molar ratio for various  $\text{Ni}_{1-x}\text{Mo}_x\text{S}$  ( $x \neq 0$ ) obtained from a) EDXS and b) ICP-OES.
